# Supplementary material for: Lifespan and Stress Resistance in Drosophila with Overexpressed DNA Repair Genes
Source: PubMed Central journal article supplement (PMC4609912; doi:10.1038/srep15299), 2015-10-19
Supplement: srep15299-s1.pdf [file srep15299-s1.pdf]

## Lifespan and Stress Resistance in *Drosophila* with Overexpressed DNA Repair Genes

Mikhail Shaposhnikov, Ekaterina Proshkina, Lyubov Shilova, Alex Zhavoronkov and Alexey Moskalev\*

### Supplementary Tables

**Supplementary Table S1.** Age-dependent changes in the efficiency of DNA repair

| DNA repair mechanism       | Repair efficiency | References |
|----------------------------|-------------------|------------|
| Base excision repair       | ↓                 | 1, 2       |
| Nucleotide excision repair | ↓                 | 3          |
| Mismatch repair            | ↓                 | 4          |
| Single-strand break repair | ↓                 | 5, 6       |
| Homologous recombination   | ↑                 | 7          |
| Single-strand annealing    | ↓                 | 7          |
| Non-homologous end joining | ↓                 | 8          |

**Supplementary Table S2.** Influence of DNA repair genes overexpression on the lifespan

| Genotype, +/-RU486                 | Sex | 90% | P(90%)                                   | M    | P(M)                                        | n(rep) | n   |
|------------------------------------|-----|-----|------------------------------------------|------|---------------------------------------------|--------|-----|
| <b><i>da-GAL4</i> driver</b>       |     |     |                                          |      |                                             |        |     |
| <i>da-GAL4&gt;w</i>                | M   | 61  |                                          | 44   |                                             | 4      | 564 |
| <i>w&gt;UAS-mei-9</i>              | M   | 58  |                                          | 37   |                                             | 1      | 161 |
| <i>da-GAL4&gt;UAS-mei-9</i>        | M   | 70  | 3E-05 <sup>a</sup> , 0.0001 <sup>c</sup> | 52   | 1.2E-11 <sup>a</sup> , 0 <sup>c</sup>       | 1      | 158 |
| <i>w&gt;UAS-Rrp1</i>               | M   | 59  |                                          | 43   |                                             | 3      | 438 |
| <i>da-GAL4&gt;UAS-Rrp1</i>         | M   | 63  | 0.668 <sup>a</sup> , 0.668 <sup>d</sup>  | 49   | 0.122 <sup>a</sup> , 0.526 <sup>d</sup>     | 3      | 449 |
| <i>w&gt;UAS-Brca2</i>              | M   | 52  |                                          | 33   |                                             | 1      | 157 |
| <i>da-GAL4&gt;UAS-Brca2</i>        | M   | 55  | 0.0002 <sup>a</sup> , 2E-05 <sup>e</sup> | 42.5 | 6.86E-06 <sup>a</sup> , 0.0039 <sup>e</sup> | 1      | 154 |
| <i>w&gt;UAS-Ku80</i>               | M   | 51  |                                          | 35   |                                             | 2      | 297 |
| <i>da-GAL4&gt;UAS-Ku80</i>         | M   | 51  | 0 <sup>a</sup> , 0.2490 <sup>f</sup>     | 42   | 1.96E-10 <sup>a</sup> , 0.0185 <sup>f</sup> | 2      | 266 |
| <i>w&gt;UAS-WRNexo</i>             | M   | 57  |                                          | 43   |                                             | 1      | 153 |
| <i>da-GAL4&gt;UAS-WRNexo</i>       | M   | 54  | 0.829 <sup>a</sup> , 0.0004 <sup>h</sup> | 26   | 9.81E-07 <sup>a</sup> , 0.0003 <sup>h</sup> | 1      | 45  |
| <i>da-GAL4&gt;w</i>                | F   | 67  |                                          | 55   |                                             | 4      | 555 |
| <i>w&gt;UAS-mnk</i>                | F   | 66  |                                          | 54   |                                             | 1      | 141 |
| <i>da-GAL4&gt;UAS-mnk</i>          | F   | 70  | 0.009 <sup>a</sup> , 0.723 <sup>b</sup>  | 58   | 0.002 <sup>a</sup> , 0.0071 <sup>b</sup>    | 1      | 207 |
| <i>w&gt;UAS-mei-9</i>              | F   | 64  |                                          | 58   |                                             | 1      | 150 |
| <i>da-GAL4&gt;UAS-mei-9</i>        | F   | 74  | 0 <sup>a</sup> , 0 <sup>c</sup>          | 64   | 0 <sup>a</sup> , 0 <sup>c</sup>             | 1      | 178 |
| <i>w&gt;UAS-Rrp1</i>               | F   | 66  |                                          | 50.5 |                                             | 3      | 386 |
| <i>da-GAL4&gt;UAS-Rrp1</i>         | F   | 68  | 0.578 <sup>a</sup> , 0.0703 <sup>d</sup> | 52   | 0.055 <sup>a</sup> , 0.0269 <sup>d</sup>    | 3      | 423 |
| <i>w&gt;UAS-Brca2</i>              | F   | 53  |                                          | 46   |                                             | 1      | 122 |
| <i>da-GAL4&gt;UAS-Brca2</i>        | F   | 61  | 0.039 <sup>a</sup> , 1E-05 <sup>e</sup>  | 48   | 3.12E-08 <sup>a</sup> , 0.0002 <sup>e</sup> | 1      | 147 |
| <i>w&gt;UAS-spn-B</i>              | F   | 61  |                                          | 59   |                                             | 1      | 157 |
| <i>da-GAL4&gt;UAS-spn-B</i>        | F   | 72  | 0.0003 <sup>a</sup> , 0 <sup>g</sup>     | 62   | 1.64E-07 <sup>a</sup> , 5E-11 <sup>g</sup>  | 1      | 159 |
| <i>w&gt;UAS-WRNexo</i>             | F   | 64  |                                          | 51   |                                             | 1      | 146 |
| <i>da-GAL4&gt;UAS-WRNexo</i>       | F   | 77  | 0 <sup>a</sup> , 0 <sup>h</sup>          | 61   | 6.15E-07 <sup>a</sup> , 0 <sup>h</sup>      | 1      | 123 |
| <b><i>Act5C-GS</i> driver</b>      |     |     |                                          |      |                                             |        |     |
| <i>UAS-Hus1/Act5C-GS, -RU486</i>   | M   | 60  |                                          | 42   |                                             | 2      | 402 |
| <i>UAS-Hus1/Act5C-GS, +RU486</i>   | M   | 24  | 0 <sup>a</sup>                           | 15   | 0 <sup>a</sup>                              | 2      | 433 |
| <i>UAS-mei-9/Act5C-GS, -RU486</i>  | M   | 39  |                                          | 56   |                                             | 2      | 385 |
| <i>UAS-mei-9/Act5C-GS, +RU486</i>  | M   | 40  | 0.6825 <sup>c</sup>                      | 56   | 0.446 <sup>c</sup>                          | 2      | 411 |
| <i>UAS-mus210/Act5C-GS, -RU486</i> | M   | 39  |                                          | 59   |                                             | 2      | 431 |
| <i>UAS-mus210/Act5C-GS, +RU486</i> | M   | 16  | 0 <sup>d</sup>                           | 32   | 0 <sup>d</sup>                              | 2      | 396 |
| <i>UAS-Brca2/Act5C-GS, -RU486</i>  | M   | 40  |                                          | 63   |                                             | 2      | 499 |
| <i>UAS-Brca2/Act5C-GS, +RU486</i>  | M   | 12  | 0 <sup>f</sup>                           | 31   | 0 <sup>f</sup>                              | 2      | 473 |
| <i>UAS-WRNexo/Act5C-GS, -RU486</i> | M   | 43  |                                          | 61   |                                             | 2      | 422 |
| <i>UAS-WRNexo/Act5C-GS, +RU486</i> | M   | 14  | 0 <sup>i</sup>                           | 20   | 0 <sup>i</sup>                              | 2      | 353 |
| <i>UAS-Hus1/Act5C-GS, -RU486</i>   | F   | 64  |                                          | 48   |                                             | 2      | 409 |
| <i>UAS-Hus1/Act5C-GS, +RU486</i>   | F   | 49  | 3E-05 <sup>a</sup>                       | 15   | 0 <sup>a</sup>                              | 2      | 415 |
| <i>UAS-mei-9/Act5C-GS, -RU486</i>  | F   | 39  |                                          | 59   |                                             | 2      | 463 |
| <i>UAS-mei-9/Act5C-GS, +RU486</i>  | F   | 18  | 0 <sup>c</sup>                           | 37   | 0 <sup>c</sup>                              | 2      | 439 |

|                                    |   |    |                                      |      |                                               |   |     |
|------------------------------------|---|----|--------------------------------------|------|-----------------------------------------------|---|-----|
| <i>UAS-Rrp1/Act5C-GS, -RU486</i>   | F | 44 |                                      | 64   |                                               | 2 | 365 |
| <i>UAS-Rrp1/Act5C-GS, +RU486</i>   | F | 13 | 0 <sup>e</sup>                       | 49   | 0 <sup>e</sup>                                | 2 | 522 |
| <i>UAS-Brc2/Act5C-GS, -RU486</i>   | F | 49 |                                      | 63   |                                               | 2 | 552 |
| <i>UAS-Brc2/Act5C-GS, +RU486</i>   | F | 16 | 0 <sup>f</sup>                       | 29   | 0 <sup>f</sup>                                | 2 | 449 |
| <i>UAS-Ku80/Act5C-GS, -RU486</i>   | F | 58 |                                      | 71   |                                               | 2 | 349 |
| <i>UAS-Ku80/Act5C-GS, +RU486</i>   | F | 24 | 0 <sup>h</sup>                       | 36   | 0 <sup>h</sup>                                | 2 | 588 |
| <i>UAS-WRNexo/Act5C-GS, -RU486</i> | F | 46 |                                      | 59   |                                               | 2 | 410 |
| <i>UAS-WRNexo/Act5C-GS, +RU486</i> | F | 19 | 0 <sup>i</sup>                       | 33   | 0 <sup>i</sup>                                | 2 | 296 |
| <b>1407-GAL4 driver</b>            |   |    |                                      |      |                                               |   |     |
| <i>1407-GAL4&gt;w<sup>a</sup></i>  | M | 74 |                                      | 53   |                                               | 2 | 189 |
| <i>1407-GAL4&gt; w<sup>b</sup></i> | M | 61 |                                      | 48   |                                               | 2 | 283 |
| <i>1407-GAL4&gt; w<sup>c</sup></i> | M | 72 |                                      | 55   |                                               | 2 | 245 |
| <i>1407-GAL4&gt; w<sup>d</sup></i> | M | 63 |                                      | 49   |                                               | 2 | 175 |
| <i>1407-GAL4&gt;w<sup>e</sup></i>  | M | 67 |                                      | 50   |                                               | 2 | 145 |
| <i>w&gt;UAS-Hus1</i>               | M | 50 |                                      | 39   |                                               | 2 | 191 |
| <i>1407-GAL4&gt;UAS-Hus1</i>       | M | 63 | 0.005 <sup>a</sup> , 0 <sup>f</sup>  | 51   | 0.023 <sup>a</sup> , 0 <sup>f</sup>           | 2 | 246 |
| <i>w&gt;UAS-mnk</i>                | M | 53 |                                      | 33   |                                               | 2 | 215 |
| <i>1407-GAL4&gt;UAS-mnk</i>        | M | 64 | 0.061 <sup>a</sup> , 0 <sup>g</sup>  | 43   | 2.71E-05 <sup>a</sup> , 1.15E-09 <sup>g</sup> | 2 | 182 |
| <i>w&gt;UAS-mei-9</i>              | M | 53 |                                      | 51   |                                               | 2 | 280 |
| <i>1407-GAL4&gt;UAS-mei-9</i>      | M | 58 | 0 <sup>c</sup> , 0 <sup>h</sup>      | 52   | 0 <sup>c</sup> , 1.31E-09 <sup>h</sup>        | 2 | 227 |
| <i>w&gt;UAS-mus210</i>             | M | 46 |                                      | 40   |                                               | 2 | 268 |
| <i>1407-GAL4&gt;UAS-mus210</i>     | M | 55 | 0.0002 <sup>b</sup> , 0 <sup>i</sup> | 43   | 7.36E-08 <sup>b</sup> , 0 <sup>i</sup>        | 2 | 250 |
| <i>w&gt;UAS-Rrp1</i>               | M | 51 |                                      | 36   |                                               | 1 | 159 |
| <i>1407-GAL4&gt;UAS-Rrp1</i>       | M | 50 | 0 <sup>c</sup> , 0.4331 <sup>j</sup> | 29   | 0 <sup>c</sup> , 0.0984 <sup>j</sup>          | 2 | 160 |
| <i>w&gt;UAS-Brc2</i>               | M | 57 |                                      | 46   |                                               | 2 | 202 |
| <i>1407-GAL4&gt;UAS-Brc2</i>       | M | 48 | 0 <sup>a</sup> , 0.0007 <sup>k</sup> | 19   | 0 <sup>a</sup> , 0 <sup>k</sup>               | 2 | 146 |
| <i>w&gt;UAS-spn-B</i>              | M | 55 |                                      | 43   |                                               | 2 | 209 |
| <i>1407-GAL4&gt;UAS-spn-B</i>      | M | 69 | 0.093 <sup>a</sup> , 0 <sup>l</sup>  | 50   | 0.13 <sup>a</sup> , 4E-12 <sup>l</sup>        | 2 | 257 |
| <i>w&gt;UAS-WRNexo</i>             | M | 61 |                                      | 37   |                                               | 2 | 254 |
| <i>1407-GAL4&gt;UAS-WRNexo</i>     | M | 32 | 0 <sup>d</sup> , 0 <sup>n</sup>      | 18   | 0 <sup>d</sup> , 0 <sup>n</sup>               | 2 | 197 |
| <i>1407-GAL4&gt;w<sup>a</sup></i>  | F | 80 |                                      | 62   |                                               | 2 | 243 |
| <i>1407-GAL4&gt; w<sup>b</sup></i> | F | 76 |                                      | 63   |                                               | 2 | 241 |
| <i>1407-GAL4&gt; w<sup>c</sup></i> | F | 73 |                                      | 58.5 |                                               | 2 | 158 |
| <i>1407-GAL4&gt; w<sup>d</sup></i> | F | 82 |                                      | 69   |                                               | 2 | 280 |
| <i>1407-GAL4&gt;w<sup>e</sup></i>  | F | 64 |                                      | 53   |                                               | 2 | 147 |
| <i>w&gt;UAS-Hus1</i>               | F | 78 |                                      | 55   |                                               | 2 | 174 |
| <i>1407-GAL4&gt;UAS-Hus1</i>       | F | 49 | 0 <sup>a</sup> , 0 <sup>f</sup>      | 41   | 0 <sup>a</sup> , 0 <sup>f</sup>               | 2 | 227 |
| <i>w&gt;UAS-mnk</i>                | F | 62 |                                      | 47   |                                               | 2 | 226 |
| <i>1407-GAL4&gt;UAS-mnk</i>        | F | 57 | 0 <sup>a</sup> , 0 <sup>g</sup>      | 48   | 0 <sup>a</sup> , 0.0014 <sup>g</sup>          | 2 | 132 |
| <i>w&gt;UAS-mei-9</i>              | F | 81 |                                      | 64   |                                               | 2 | 245 |
| <i>1407-GAL4&gt;UAS-mei-9</i>      | F | 70 | 0.7756 <sup>c</sup> , 0 <sup>h</sup> | 60   | 0.849 <sup>c</sup> , 0 <sup>h</sup>           | 2 | 264 |
| <i>w&gt;UAS-mus210</i>             | F | 71 |                                      | 57   |                                               | 2 | 248 |

|                                      |   |    |                                           |      |                                              |   |     |
|--------------------------------------|---|----|-------------------------------------------|------|----------------------------------------------|---|-----|
| <i>1407-GAL4&gt;UAS-mus210</i>       | F | 74 | 1E-04 <sup>b</sup> , 0.0043 <sup>i</sup>  | 60   | 0.0004 <sup>b</sup> , 0.237 <sup>i</sup>     | 2 | 228 |
| <i>w&gt;UAS-Rrp1</i>                 | F | 63 |                                           | 46   |                                              | 1 | 145 |
| <i>1407-GAL4&gt;UAS-Rrp1</i>         | F | 65 | 0.0323 <sup>c</sup> , 0.0605 <sup>j</sup> | 57   | 0.0012 <sup>e</sup> , 3.12E-06 <sup>j</sup>  | 2 | 147 |
| <i>w&gt;UAS- Brca2</i>               | F | 74 |                                           | 62.5 |                                              | 2 | 260 |
| <i>1407-GAL4&gt;UAS-Brca2</i>        | F | 53 | 1E-05 <sup>a</sup> , 0.0155 <sup>k</sup>  | 27   | 0 <sup>a</sup> , 0 <sup>k</sup>              | 2 | 125 |
| <i>w&gt;UAS- spn-B</i>               | F | 73 |                                           | 60   |                                              | 2 | 257 |
| <i>1407-GAL4&gt;UAS-spn-B</i>        | F | 72 | 0 <sup>a</sup> , 0.481 <sup>l</sup>       | 55   | 9.19E-09 <sup>a</sup> , 0.17 <sup>l</sup>    | 2 | 231 |
| <i>w&gt;UAS-Ku80</i>                 | F | 65 |                                           | 50   |                                              | 1 | 141 |
| <i>1407-GAL4&gt;UAS-Ku80</i>         | F | 75 | 2E-05 <sup>e</sup> , 0 <sup>m</sup>       | 58   | 1.37E-09 <sup>e</sup> , 1.8E-08 <sup>m</sup> | 2 | 122 |
| <i>w&gt;UAS-WRNexo</i>               | F | 74 |                                           | 55   |                                              | 2 | 258 |
| <i>1407-GAL4&gt;UAS-WRNexo</i>       | F | 50 | 0 <sup>d</sup> , 0 <sup>n</sup>           | 37   | 0 <sup>d</sup> , 0 <sup>n</sup>              | 2 | 245 |
| <b><i>Elav-GS driver</i></b>         |   |    |                                           |      |                                              |   |     |
| <i>Elav-GS&gt;UAS-Hus1, -RU486</i>   | M | 76 |                                           | 64   |                                              | 2 | 324 |
| <i>Elav-GS&gt;UAS-Hus1, +RU486</i>   | M | 81 | 0.0354 <sup>a</sup>                       | 66.5 | 2.41E-07 <sup>a</sup>                        | 2 | 339 |
| <i>Elav-GS&gt;UAS-mnk, -RU486</i>    | M | 71 |                                           | 62   |                                              | 2 | 342 |
| <i>Elav-GS&gt;UAS-mnk, +RU486</i>    | M | 82 | 0 <sup>b</sup>                            | 64   | 3E-12 <sup>b</sup>                           | 2 | 371 |
| <i>Elav-GS&gt;UAS-me1-9, -RU486</i>  | M | 65 |                                           | 50   |                                              | 1 | 108 |
| <i>Elav-GS&gt;UAS-me1-9, +RU486</i>  | M | 72 | 2E-05 <sup>c</sup>                        | 64   | 0 <sup>c</sup>                               | 1 | 125 |
| <i>Elav-GS&gt;UAS-mus210, -RU486</i> | M | 64 |                                           | 50   |                                              | 1 | 140 |
| <i>Elav-GS&gt;UAS-mus210, +RU486</i> | M | 68 | 5E-05 <sup>d</sup>                        | 54   | 8.25E-05 <sup>d</sup>                        | 1 | 123 |
| <i>Elav-GS&gt;UAS-Brca2, -RU486</i>  | M | 65 |                                           | 54   |                                              | 2 | 337 |
| <i>Elav-GS&gt;UAS-Brca2, +RU486</i>  | M | 67 | 0.4472 <sup>e</sup>                       | 51   | 0.196 <sup>f</sup>                           | 2 | 270 |
| <i>Elav-GS&gt;UAS-spn-B, -RU486</i>  | M | 64 |                                           | 56   |                                              | 2 | 270 |
| <i>Elav-GS&gt;UAS-spn-B, +RU486</i>  | M | 61 | 1E-05 <sup>f</sup>                        | 48   | 4.5E-11 <sup>g</sup>                         | 2 | 322 |
| <i>Elav-GS&gt;UAS-WRNexo, -RU486</i> | M | 64 |                                           | 44   |                                              | 1 | 137 |
| <i>Elav-GS&gt;UAS-WRNexo, +RU486</i> | M | 72 | 3E-04 <sup>g</sup>                        | 65   | 0 <sup>i</sup>                               | 1 | 140 |
| <i>Elav-GS&gt;UAS-Hus1, -RU486</i>   | F | 84 |                                           | 68   |                                              | 2 | 328 |
| <i>Elav-GS&gt;UAS-Hus1, +RU486</i>   | F | 88 | 0.0096 <sup>a</sup>                       | 69   | 0.0012 <sup>a</sup>                          | 2 | 338 |
| <i>Elav-GS&gt;UAS-me1-9, -RU486</i>  | F | 77 |                                           | 70   |                                              | 1 | 149 |
| <i>Elav-GS&gt;UAS-me1-9, +RU486</i>  | F | 78 | 0.012 <sup>c</sup>                        | 71   | 0.0131 <sup>c</sup>                          | 1 | 112 |
| <i>Elav-GS&gt;UAS-mus210, -RU486</i> | F | 78 |                                           | 68   |                                              | 1 | 162 |
| <i>Elav-GS&gt;UAS-mus210, +RU486</i> | F | 78 | 0.0031 <sup>d</sup>                       | 65   | 0.187 <sup>d</sup>                           | 1 | 150 |
| <i>Elav-GS&gt;UAS-Brca2, -RU486</i>  | F | 75 |                                           | 64   |                                              | 2 | 360 |
| <i>Elav-GS&gt;UAS-Brca2, +RU486</i>  | F | 71 | 1E-05 <sup>e</sup>                        | 50   | 0 <sup>f</sup>                               | 2 | 379 |
| <i>Elav-GS&gt;UAS-spn-B, -RU486</i>  | F | 76 |                                           | 59   |                                              | 2 | 281 |
| <i>Elav-GS&gt;UAS-spn-B, +RU486</i>  | F | 74 | 0.003 <sup>f</sup>                        | 61   | 0.867 <sup>g</sup>                           | 2 | 278 |
| <i>Elav-GS&gt;UAS-WRNexo, -RU486</i> | F | 74 |                                           | 64   |                                              | 1 | 142 |
| <i>Elav-GS&gt;UAS-WRNexo, +RU486</i> | F | 73 | 0.079 <sup>g</sup>                        | 64   | 0.288 <sup>i</sup>                           | 1 | 116 |

-RU486, no mifepristone (no overexpression); +RU486, mifepristone (overexpression); M, Male; F, Female; 90%, 90th percentile; P(90), P-value (Wang-Allison test); P(M), P-value (Mantel-Cox test): NS, not significant; n(rep), number of experiments; n, number of flies.

Controls for *da-GAL4>UAS*: <sup>a</sup>*da-GAL4>w* and <sup>b</sup>*UAS-mnk*; <sup>c</sup>*UAS-me1-9*; <sup>d</sup>*UAS-Rrp1*; <sup>e</sup>*UAS-Brca2*; <sup>f</sup>*UAS-Ku80*; <sup>g</sup>*UAS-spn-B*; <sup>h</sup>*UAS-WRNexo*.

Controls for *Act5C-GS>UAS*: <sup>a</sup>*Act5C-GS>UAS-Hus1*, -RU486; <sup>b</sup>*Act5C-GS>UAS-mnk*, -RU486; <sup>c</sup>*Act5C-GS>UAS-me1-9*, -RU486; <sup>d</sup>*Act5C-GS>UAS-mus210*, -RU486; <sup>e</sup>*Act5C-GS>UAS-Rrp1*, -RU486; <sup>f</sup>*Act5C-GS>UAS-Brca2*, -RU486; <sup>g</sup>*Act5C-GS>UAS-spn-B*, -RU486; <sup>h</sup>*Act5C-GS>UAS-Ku80*, -RU486; <sup>i</sup>*Act5C-GS>UAS-WRNexo*, -RU486.

Controls for *1407-GAL4>UAS*: <sup>a</sup>*1407-GAL4>w<sup>a</sup>*; <sup>b</sup>*1407-GAL4>w<sup>b</sup>*; <sup>c</sup>*1407-GAL4>w<sup>c</sup>*; <sup>d</sup>*1407-GAL4>w<sup>d</sup>*; <sup>e</sup>*1407-GAL4>w<sup>e</sup>*; <sup>f</sup>*w>UAS-Hus1*; <sup>g</sup>*w>UAS-mnk*; <sup>h</sup>*w>UAS-me1-9*; <sup>i</sup>*w>UAS-mus210*; <sup>j</sup>*w>UAS-Rrp1*; <sup>k</sup>*w>UAS-Brca2*; <sup>l</sup>*w>UAS-spn-B*; <sup>m</sup>*w>UAS-Ku80*; <sup>n</sup>*w>UAS-WRNexo*.

Controls for *Elav-GS>UAS*: <sup>a</sup>*Elav-GS>UAS-Hus1*, -RU486; <sup>b</sup>*Elav-GS>UAS-mnk*, -RU486; <sup>c</sup>*Elav-GS>UAS-me1-9*, -RU486; <sup>d</sup>*Elav-GS>UAS-mus210*, -RU486; <sup>e</sup>*Elav-GS>UAS-Brca2*, -RU486; <sup>f</sup>*Elav-GS>UAS-spn-B*, -RU486; <sup>g</sup>*Elav-GS>UAS-WRNexo*, -RU486.

**Supplementary Table S3.** Primers for quantitative RT-PCR

| Gene                              | Forward                         | Reverse                         |
|-----------------------------------|---------------------------------|---------------------------------|
| <i><math>\beta</math>-Tubulin</i> | 5'-GCAACTCCACTGCCATCC-3'        | 5'-CCTGCTCCTCCTCGAACT-3'        |
| <i>Hus1</i>                       | 5'-TGATGCAGGATCCGCTGTACATGA-3'  | 5'-TCCTCAGCTGTAATTCCTGCCCAA-3'  |
| <i>mnk</i>                        | 5'-ATGTGCCATGCCGTCAAGTACCTA-3'  | 5'-TCCTCGTCATTGGTCTCCAGCAA-3'   |
| <i>mei-9</i>                      | 5'-TCCTCAAGGCCTACAGCGATTC-3'    | 5'-TCCAGATAAACGCGCTCTCTTTC-3'   |
| <i>mus210</i>                     | 5'-AGAAGACGGTGCATTTGAGATTGC-3'  | 5'-CCTCGCAAACAATGAAGCCATCG-3'   |
| <i>Rrp1</i>                       | 5'-AGGATGGTCTGCAGTTGATTGAC-3'   | 5'-GTTTGCGCACTTGGTTTCCTG-3'     |
| <i>Brca2</i>                      | 5'-TCGTCGCCGTGGAGGATCTTATTT-3'  | 5'-TCTGCGTATGTTGGAGACGAGCAA-3'  |
| <i>spn-B</i>                      | 5'-AGATTGCTGCAGATGAGCAAAGCC -3' | 5'-TTTATAACGCACGCCAGGAGAGGT-3'  |
| <i>Ku80</i>                       | 5'-GAGCTTCAGAATGTCGCAACTACC-3'  | 5'-GGAAAGTCGTTGAAATCGAAGAGC -3' |
| <i>WRNexo</i>                     | 5'-TGGTGGCCCTTATCAATCATCCC-3'   | 5'-GTGCCAGCTTTCGGAAATCGTTC-3'   |

Supplementary Figures

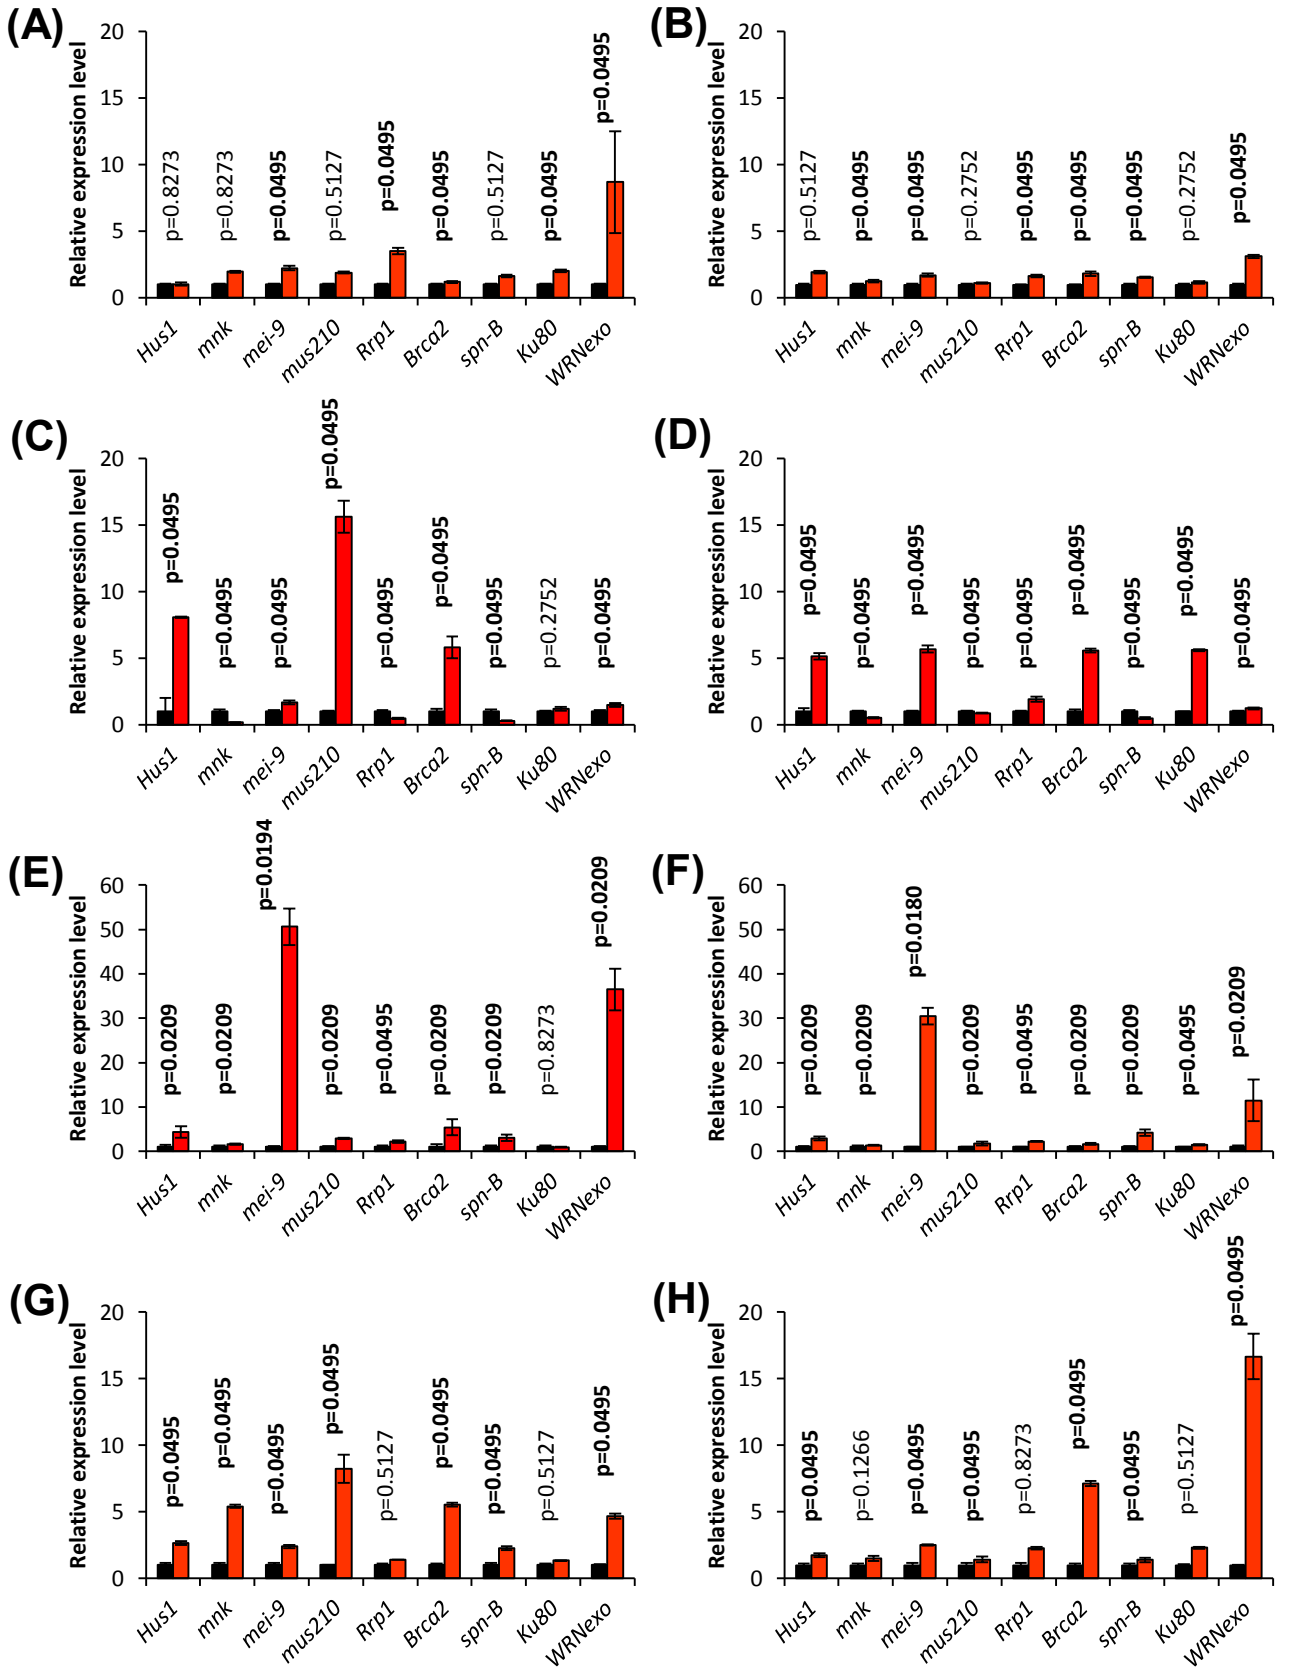

Supplementary Figure S1. The relative level of expression of DNA repair genes in control flies (black) and flies with overexpression (red).

Overexpression under control of *da-GAL4* (A, males and B, females), *Act5C-GS* (C, males and D, females), *1407-GAL4* (E, males and F, females), and *Elav-GS* (G, males and H, females). P-values were calculated by Mann-Whitney U-test. The error bars represent standard error of the mean.



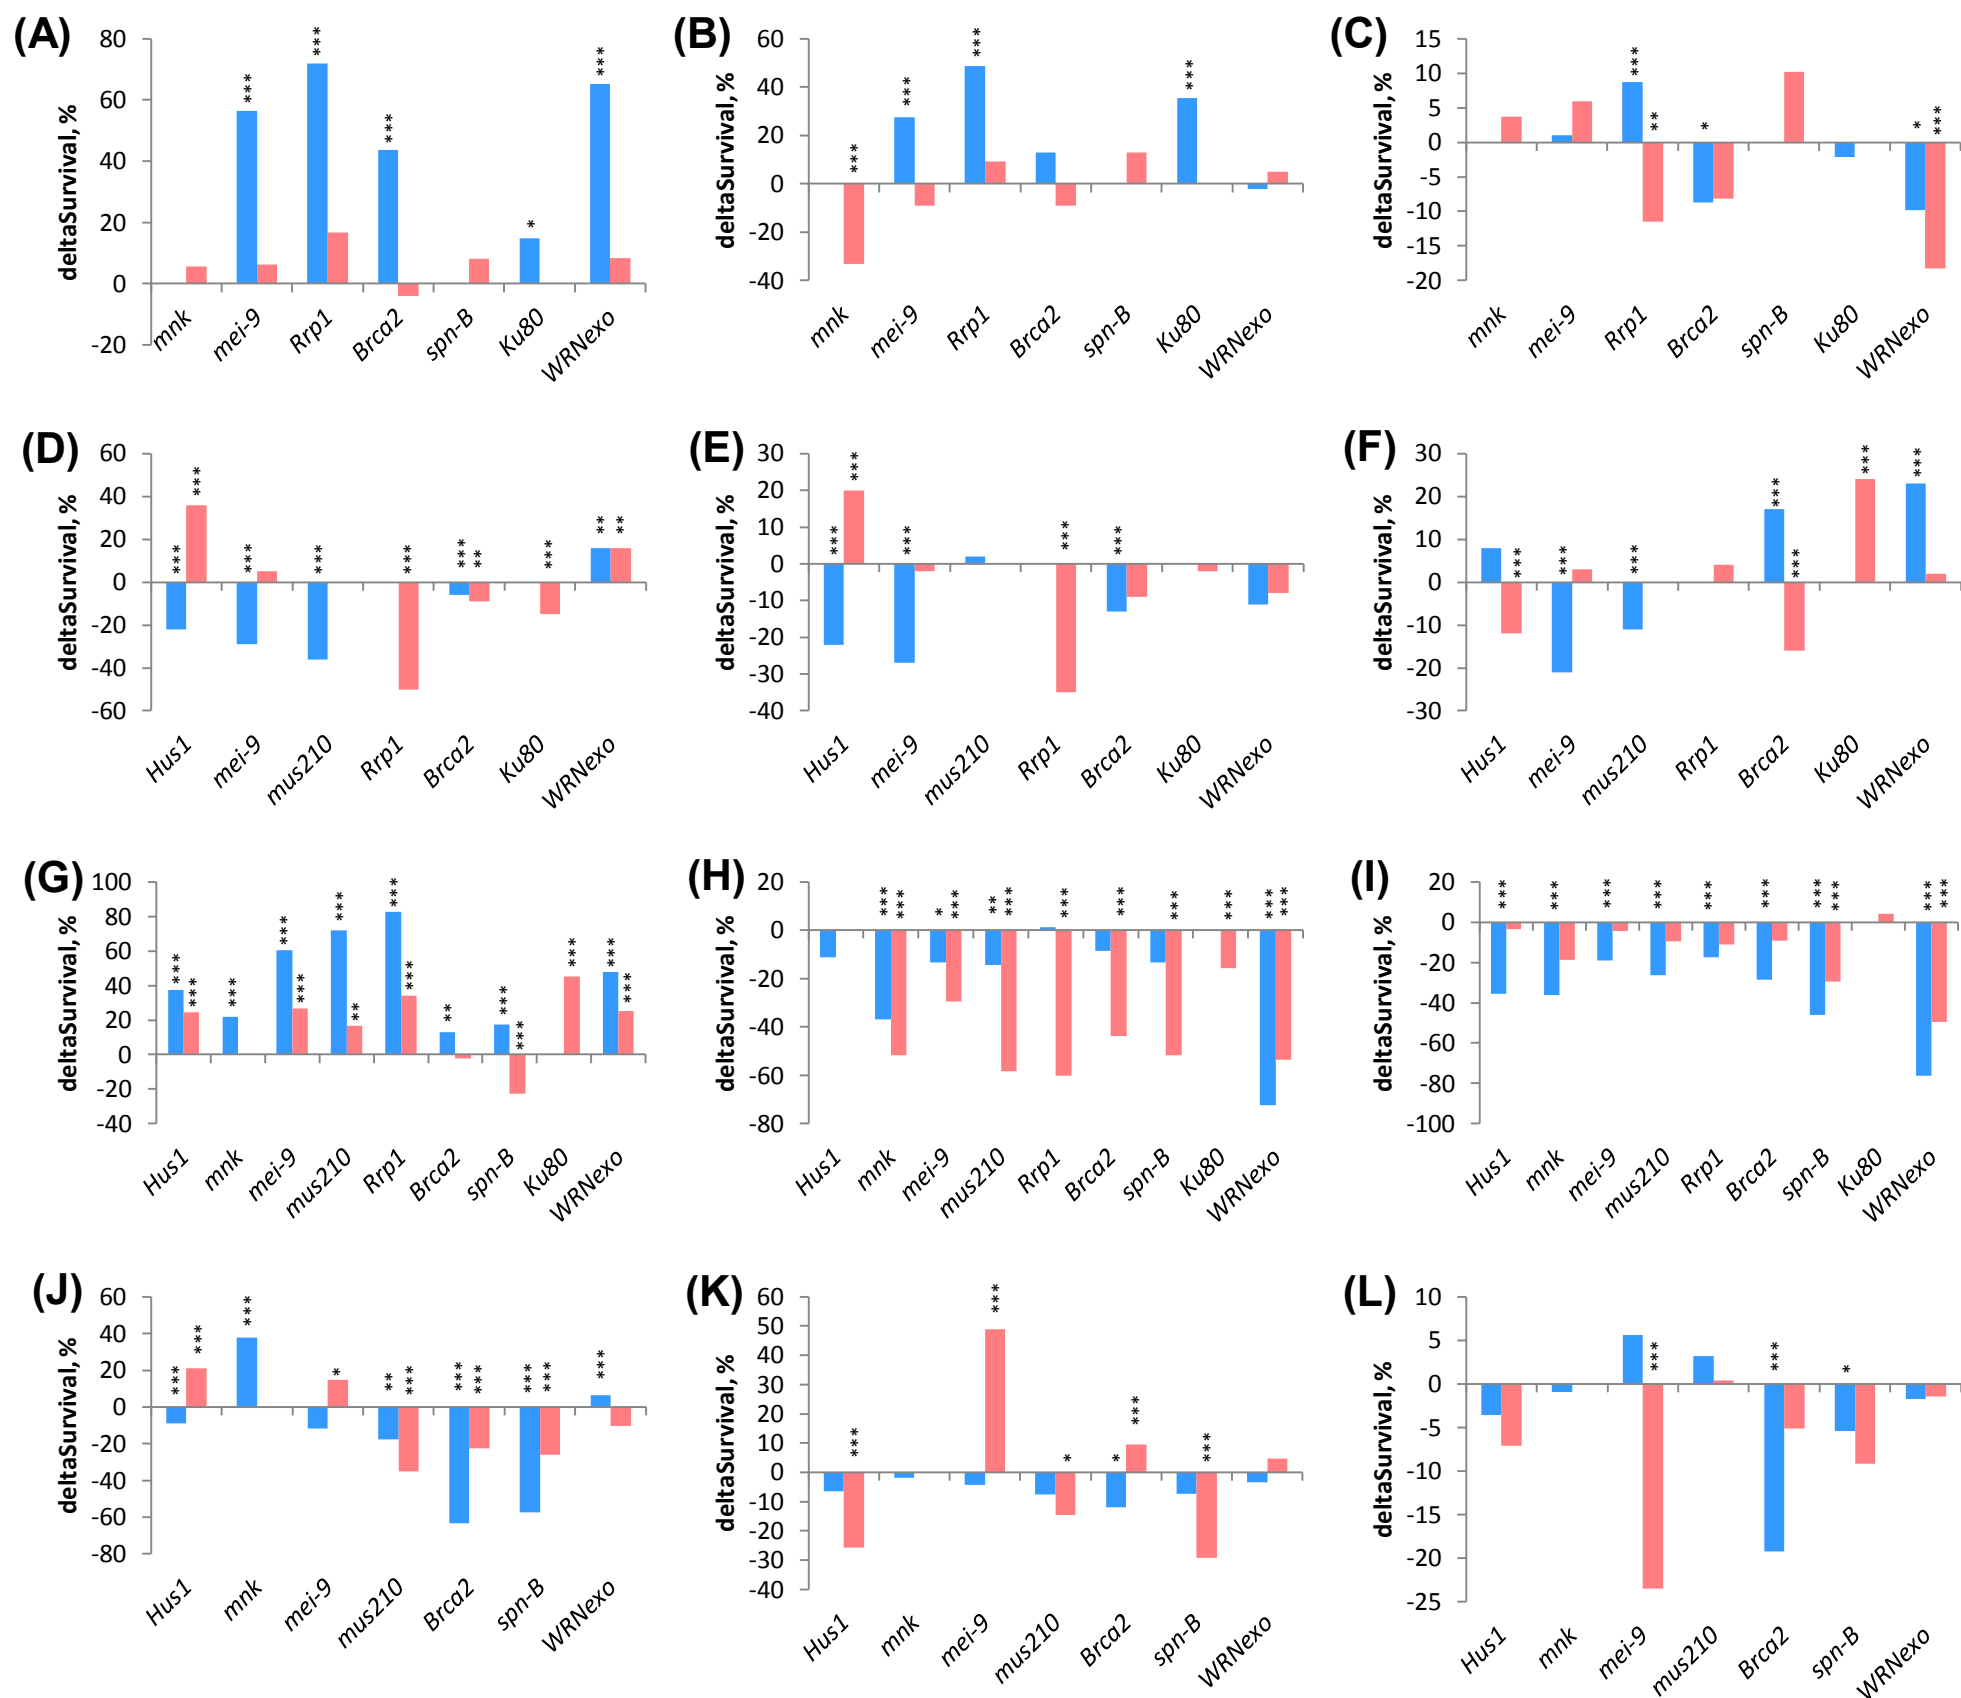

**Supplementary Figure S2. The influence of overexpression of DNA repair genes on the stress resistance of males (blue) and females (red).**

Overexpression under control of *da-GAL4* (A, B, C), *Act5C-GS* (D, E, F), *1407-GAL4* (G, H, I), and *Elav-GS* (J, K, L). Survival after hyperthermia (A, D, G, J), oxidative stress (B, E, H, K), and starvation (C, F, I, L). \* $p < 0.05$ , \*\* $p < 0.01$ , \*\*\* $p < 0.001$ , Fisher's exact test.

## Supplementary References

- 1 Atamna, H., Cheung, I. & Ames, B. N. A method for detecting abasic sites in living cells: Age-dependent changes in base excision repair. *Proc. Natl. Acad. Sci. USA* **97**, 686-691 (2000).
- 2 Rao, K. S., Annapurna, V. V., Raji, N. S. & Harikrishna, T. Loss of base excision repair in aging rat neurons and its restoration by DNA polymerase beta. *Mol. Brain Res.* **85**, 251-259 (2000).
- 3 Vijg, J., Mullaart, E., Lohman, P. H. & Knook, D. L. UV-induced unscheduled DNA synthesis in fibroblasts of aging inbred rats. *Mutat. Res.* **146**, 197-204 (1985).
- 4 Toyota, M. *et al.* CpG island methylator phenotype in colorectal cancer. *Proc. Natl. Acad. Sci. USA* **96**, 8681-8686 (1999).
- 5 Newton, R. K., Ducore, J. M. & Sohal, R. S. Effect of age on endogenous DNA single-strand breakage, strand break induction and repair in the adult housefly, *Musca domestica*. *Mutat. Res.* **219**, 113-120 (1989).
- 6 Singh, N. P., Danner, D. B., Tice, R. R., Brant, L. & Schneider, E. L. DNA damage and repair with age in individual human lymphocytes. *Mutat. Res.* **237**, 123-130 (1990).
- 7 Preston, C. R., Flores, C. & Engels, W. R. Age-dependent usage of double-strand-break repair pathways. *Curr. Biol.* **16**, 2009-2015, doi:10.1016/j.cub.2006.08.058 (2006).
- 8 Frasca, D. *et al.* Effect of age on DNA binding of the ku protein in irradiated human peripheral blood mononuclear cells (PBMC). *Exp. Gerontol.* **34**, 645-658 (1999).
